# Supplementary material for: Crystal structure and catalytic mechanism of the essential m1G37 tRNA methyltransferase TrmD from Pseudomonas aeruginosa
Source: PubMed Central journal article supplement — RNA. 2019 Nov;25(11):1481–96. doi: 10.1261/rna.066746.118 (PMC6795141; doi:10.1261/rna.066746.118), 2019-11
Supplement: supp_066746.118_Supplemental_Tables.pdf [file supp_066746.118_Supplemental_Tables.pdf]

**Supplemental Table S1.** Primers and single-stranded synthetic DNAs (ssDNAs) for *in vitro* transcription of tRNAs.

| <b>Primers and single-strand synthetic DNAs</b> | <b>Sequence (5'-3')</b>                                                                                                         |
|-------------------------------------------------|---------------------------------------------------------------------------------------------------------------------------------|
| <b>Primers</b>                                  |                                                                                                                                 |
| T7 primer                                       | GGATCCTAATACGACTCACTATAGGG                                                                                                      |
| tRNA <sup>Leu</sup> <sup>GAG</sup>              | TGGTACCGAGGAGGGGACTC                                                                                                            |
| tRNA <sup>Leu</sup> <sup>CAG</sup>              | TGGTGCCCAGGAGAAGACTC                                                                                                            |
| tRNA <sup>Leu</sup> <sup>TAG</sup>              | TGGTGCGGACGGAGAGACTC                                                                                                            |
| tRNA <sup>His</sup> <sup>GTG</sup>              | TGGGGTGGACGATGGGAATC                                                                                                            |
| tRNA <sup>Pro</sup> <sup>GGG</sup>              | TGGTCGGGACGGAGTGATTC                                                                                                            |
| tRNA <sup>Pro</sup> <sup>CGG</sup>              | TGGTCGGAGCGACTGGATTC                                                                                                            |
| tRNA <sup>Pro</sup> <sup>TGG</sup>              | TGGTCGGGGTAGAGAGATTC                                                                                                            |
| tRNA <sup>Gln</sup> <sup>TTG</sup>              | TGGCAGGGGCGGCTGGATTC                                                                                                            |
| BT4298                                          | GCGAGATGCGGGTGGACT                                                                                                              |
| BT4299                                          | AATCGGCCAGCCATCGATAC                                                                                                            |
| BT4316                                          | CTGATCGAATTCGCACAAGCAGATGCAGAAGA                                                                                                |
| BT4317                                          | TGATCGTCTAGAACATCTCCGGAAAGATGCTG                                                                                                |
| BT4318                                          | TAGCCGGGTACCTTCTGGAGAAGAGCAGAAG                                                                                                 |
| BT4319                                          | CGGCGAGGGGCCCTTCGACAATATCCGCATTG                                                                                                |
| <b>Single-strand synthetic DNAs</b>             |                                                                                                                                 |
| tRNA <sup>Leu</sup> (GAG)                       | GGATCCTAATACGACTCACTATAGGGGCCGAGGT<br>GGTGG AATTGGTAGACACGCTACCTTGAGGTGGT<br>AGTGGCCATAGGCTGTAGGGGTTTCGAGTCCCCT<br>CCTCGGTACCA  |
| tRNA <sup>Leu</sup> (CAG)                       | GGATCCTAATACGACTCACTATAGGGGCCCAGGT<br>GGCGGAATTGGTAGACGCACTAGGTTTCAGGTCC<br>TAGCGGTGGCAACACCGTGGAAGTTTCGAGTCTTC<br>TCCTGGGCACCA |
| tRNA <sup>Leu</sup> (UAG)                       | GGATCCTAATACGACTCACTATAGGGGCGGACGT<br>GGTGG AATTGGTAGACACACTGGATTTAGGTTCC<br>AGCGCCGCAAGGCGTGAGAGTTTCGAGTCTCTCC<br>GTCCGCACCA   |
| tRNA <sup>His</sup> (GUG)                       | GGATCCTAATACGACTCACTATAGGGGTGGGCGT<br>AGCTCAGTTGGTAGAGCACAGGATTGTGGCTCCT<br>GGTGTCGTGGGTTTCGATTCCCATCGTCCACCCCA                 |

|                          |                                                                                                                      |
|--------------------------|----------------------------------------------------------------------------------------------------------------------|
| tRNA <sup>Pro(GGG)</sup> | GGATCCTAATACGACTCACTATAGGGCGGGGCG<br>TAGCGCAGCCTGGTAGCGCACTTGCATGGGGTG<br>CAAGGGGTTCGAGTGTTTGAATCACTCCGTCCCG<br>ACCA |
| tRNA <sup>Pro(CGG)</sup> | GGATCCTAATACGACTCACTATAGGGCGGAGCGT<br>AGCGCAGCTTGGTAGCGCGTCTCGTTCCGGGACG<br>AGAAGGTCGCTGGTTTGAATCCAGTCGCTCCGA<br>CCA |
| tRNA <sup>Pro(UGG)</sup> | GGATCCTAATACGACTCACTATAGGGCGGGGTAT<br>AGCGCAGTCCGGTAGCGCGCCTGCTTTGGGAGC<br>AGGATGTCGGGAGTTTGAATCTCTCTACCCCGAC<br>CA  |
| tRNA <sup>Gln(UUG)</sup> | GGATCCTAATACGACTCACTATAGGGAGGGGCGT<br>CGCCAAGCGGTAAGGCAGCAGGTTTTGATCCTG<br>CCATGCGTTGGTTTGAATCCAGCCGCCCTGCC<br>A     |

**Supplemental Table S2.** Ribonucleosides identified by mass spectrometric analysis (Agilent 6460)

| <b>rN Name</b>                | <b>Precursor ion (m/z)</b> | <b>Product ion (m/z)</b> | <b>Fragment (V)</b> | <b>Collision (V)</b> | <b>Retention time (min)</b> |
|-------------------------------|----------------------------|--------------------------|---------------------|----------------------|-----------------------------|
| ψ                             | 245.1                      | 125.1                    | 120                 | 10                   | 1.310                       |
| Cm                            | 258.1                      | 112.1                    | 79                  | 8                    | 4.642                       |
| m <sup>3</sup> C              | 258.1                      | 126.1                    | 88                  | 8                    | 2.453                       |
| m <sup>5</sup> C              | 258.1                      | 126.1                    | 88                  | 8                    | 1.913                       |
| Um                            | 259.1                      | 113.1                    | 100                 | 8                    | 8.280                       |
| m <sup>5</sup> U              | 259.1                      | 127.1                    | 79                  | 8                    | 5.839                       |
| s <sup>2</sup> U              | 261.1                      | 129.1                    | 100                 | 8                    | 5.837                       |
| s <sup>4</sup> U              | 261.1                      | 129.1                    | 100                 | 8                    | 7.271                       |
| l                             | 269.1                      | 137.1                    | 79                  | 8                    | 5.949                       |
| mo <sup>5</sup> U             | 275.1                      | 143.1                    | 100                 | 8                    | 6.913                       |
| Am                            | 282.1                      | 136.1                    | 100                 | 8                    | 11.722                      |
| m <sup>1</sup> A              | 282.1                      | 150.1                    | 100                 | 8                    | 2.708                       |
| m <sup>2</sup> A              | 282.1                      | 150.1                    | 100                 | 8                    | 10.728                      |
| m <sup>6</sup> A              | 282.1                      | 150.1                    | 100                 | 8                    | 15.583                      |
| mnm <sup>5</sup> U            | 288.1                      | 156.1                    | 100                 | 8                    | 1.884                       |
| m <sup>6</sup> <sub>2</sub> A | 296.1                      | 164.1                    | 100                 | 8                    | 20.502                      |
| Gm                            | 298.1                      | 152.1                    | 100                 | 8                    | 14.362                      |
| m <sup>7</sup> G              | 298.1                      | 166.1                    | 100                 | 8                    | 4.859                       |
| m <sup>1</sup> G              | 298.1                      | 166.1                    | 100                 | 8                    | 13.740                      |
| m <sup>2</sup> <sub>2</sub> G | 312.1                      | 180.1                    | 100                 | 8                    | 19.548                      |
| Cmo <sup>5</sup> U            | 319.1                      | 187.1                    | 100                 | 8                    | 6.174                       |
| i <sup>6</sup> A              | 336.1                      | 204.1                    | 100                 | 8                    | 22.536                      |
| t <sup>6</sup> A              | 413.1                      | 136.1                    | 100                 | 8                    | 21.960                      |
